# Supplementary figures and images for: Population Diversity Analysis Provide Insights into Provenance Identification of Dendrobium catenatum
Source: MDPI journal article supplement (doi:10.3390/genes13112093), 2022-11-10

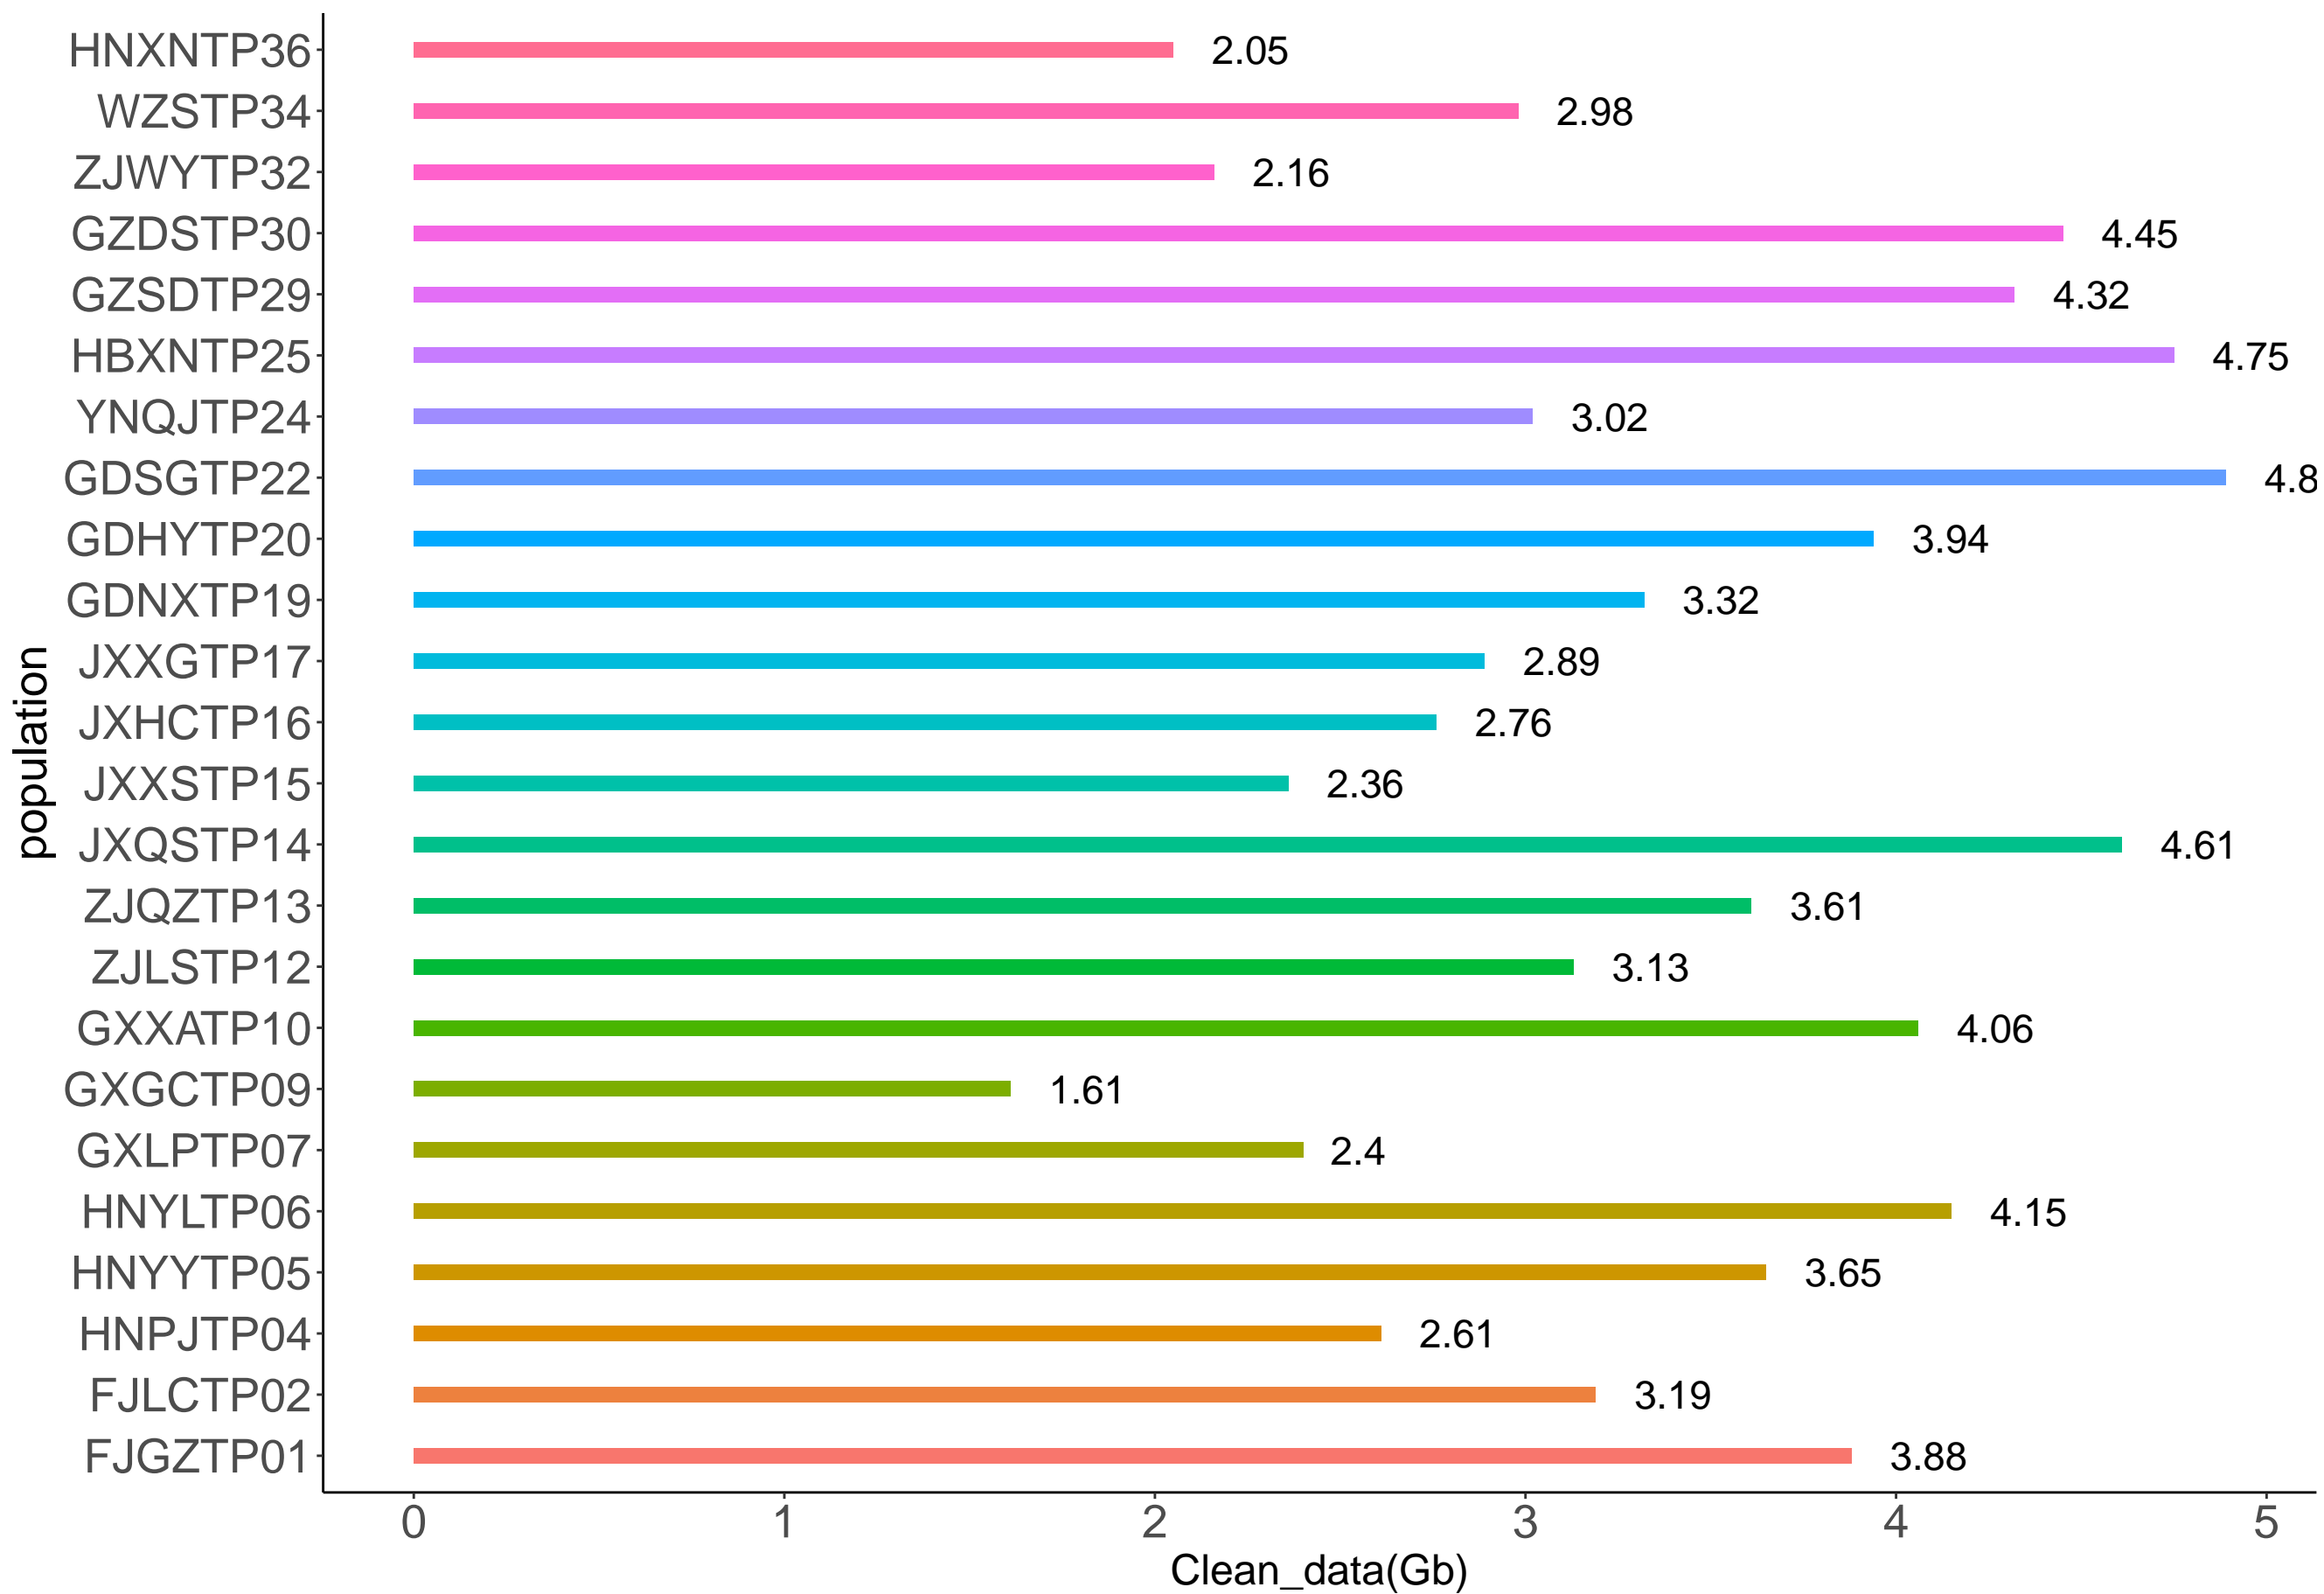

Supplement: s1 [file s1]
